# Supplementary material
Source: MDPI journal article supplement (https://www.mdpi.com/2076-2607/11/5/1310)
Supplement: s1 [file s1]

[illegible]
